# Supplementary material
Source: HighWire-hosted journal article supplement (https://oem.bmj.com/content/76/9/617)
Supplement: inline-supplementary-material-1 [file inline-supplementary-material-1.pdf]

## Supplementary tables and figures

**Table S1.** Classification of risk groups

| NACE code*                                                 | Description                                                                 |
|------------------------------------------------------------|-----------------------------------------------------------------------------|
| Risk group 1 – Contact with live animals and animal manure |                                                                             |
| 01410                                                      | Raising of dairy cattle                                                     |
| 01420                                                      | Raising of other cattle and buffaloes                                       |
| 01430                                                      | Raising of horses and other equines                                         |
| 01450                                                      | Raising of sheep and goats                                                  |
| 01460                                                      | Raising of swine and pigs                                                   |
| 01470                                                      | Raising of poultry                                                          |
| 01490                                                      | Raising of other animals                                                    |
| 01500                                                      | Mixed farming                                                               |
| 01620                                                      | Support activities for animal production                                    |
| 10110                                                      | Processing and preserving of meat                                           |
| 10120                                                      | Processing and preserving of poultry meat                                   |
| 20150                                                      | Manufacture of fertilizers and nitrogen compounds                           |
| 37000                                                      | Sewerage                                                                    |
| 38210                                                      | Treatment and disposal of non-hazardous waste**                             |
| 46231                                                      | Wholesale of live farm animals                                              |
| 46232                                                      | Wholesale of live pets                                                      |
| 75000                                                      | Veterinary activities                                                       |
| 91041                                                      | (Petting) zoos                                                              |
| Risk group 2 – Production and handling of food products    |                                                                             |
| 10130                                                      | Production of meat and poultry meat products                                |
| 10510                                                      | Operation of dairies and cheese making                                      |
| 10520                                                      | Manufacture of ice cream                                                    |
| 10710                                                      | Manufacture of bread; manufacture of fresh pastry goods and cakes           |
| 10730                                                      | Manufacture of macaroni, noodles, couscous and similar farinaceous products |
| 10840                                                      | Manufacture of condiments and seasonings                                    |
| 10850                                                      | Manufacture of prepared meals and dishes                                    |
| 10890                                                      | Manufacture of other food products n.e.c.                                   |
| 10910                                                      | Manufacture of prepared feeds for farm animals                              |
| 10920                                                      | Manufacture of prepared pet foods                                           |
| 55101                                                      | Hotel-restaurants                                                           |
| 56101                                                      | Restaurants                                                                 |
| 56102                                                      | Fast food restaurants and mobile food service activities                    |
| 56210                                                      | Event catering activities                                                   |
| 56290                                                      | Other food service activities (e.g. canteens)                               |
| Risk group 3 – Sale of animal products                     |                                                                             |
| 46320                                                      | Wholesale of meat and meat products                                         |
| 46331                                                      | Wholesale of dairy products                                                 |
| 46332                                                      | Wholesale of eggs                                                           |
| 47221                                                      | Retail sale of meat and charcuterie in specialized stores                   |
| 47222                                                      | Retail sale of game meat and poultry meat in specialized stores             |
| 47230                                                      | Retail sale of fish, crustacean and mollusks in specialized stores          |
| 47241                                                      | Retail sale of bread, cakes, flour confectionary in specialized stores      |
| 47291                                                      | Retail sale of cheese in specialized stores                                 |

\* NACE code (first 4 digits), Netherlands' specific digit (fifth)

\*\* includes processing/disposal/destruction of slurry and animal carcasses.

**Table S2.** IRs of salmonellosis and campylobacteriosis in the Dutch employed population

|                                                              | Salmonellosis |                     | Campylobacteriosis |                     |
|--------------------------------------------------------------|---------------|---------------------|--------------------|---------------------|
|                                                              | Obs           | IR (95%CI) §        | Obs                | IR (95%CI) §        |
| Total                                                        | 8,220         | 6.51 (6.36-6.65)    | 14,352             | 15.54 (15.29-15.79) |
| Gender                                                       |               |                     |                    |                     |
| Male                                                         | 4,174         | 6.06 (5.88-6.25)    | 7,584              | 15.31 (14.97-15.65) |
| Female                                                       | 4,046         | 7.04 (6.82-7.25)    | 6,768              | 15.81 (15.43-16.18) |
| <i>Salmonella</i> serovar or<br><i>Campylobacter</i> species |               |                     |                    |                     |
| <i>S. Typhimurium</i>                                        | 2,113         | 1.67 (1.60-1.74)    | -                  | -                   |
| <i>S. Enteritidis</i>                                        | 3,263         | 2.58 (2.49-2.67)    | -                  | -                   |
| Other <i>Salmonella</i> serovars                             | 2,844         | 2.25 (2.17-2.33)    | -                  | -                   |
| <i>C. jejuni</i>                                             | -             | -                   | 13,377             | 14.48 (14.24-14.73) |
| <i>C. coli</i>                                               | -             | -                   | 975                | 1.06 (0.99-1.12)    |
| Type of infection                                            |               |                     |                    |                     |
| Enteric                                                      | 7,672         | 6.07 (5.94-6.21)    | -                  | -                   |
| Septicemic                                                   | 226           | 0.18 (0.16-0.20)    | -                  | -                   |
| Other <sup>‡</sup>                                           | 322           | 0.25 (0.23-0.28)    | -                  | -                   |
| Age group                                                    |               |                     |                    |                     |
| 16-19 years                                                  | 1,024         | 12.72 (11.94-13.50) | 1332               | 22.89 (21.67-24.12) |
| 20-29 years                                                  | 2,930         | 10.85 (10.45-11.24) | 4285               | 22.46 (21.79-23.13) |
| 30-39 years                                                  | 1,428         | 4.69 (4.45-4.93)    | 2419               | 11.52 (11.06-11.98) |
| 40-49 years                                                  | 1,352         | 4.33 (4.10-4.56)    | 2763               | 11.98 (11.53-12.43) |
| ≥50 years                                                    | 1,486         | 5.02 (4.77-5.28)    | 3553               | 15.19 (14.69-15.69) |
| Total number of individuals exposed                          | 12,566,831    |                     | 11,615,429         |                     |
| Years of data                                                | 1999-2016     |                     | 2004-2016          |                     |

Obs: observed numbers. IR: incidence rate. § per 100,000 person-years. ‡ *Salmonella* isolated from urinary or wounds.

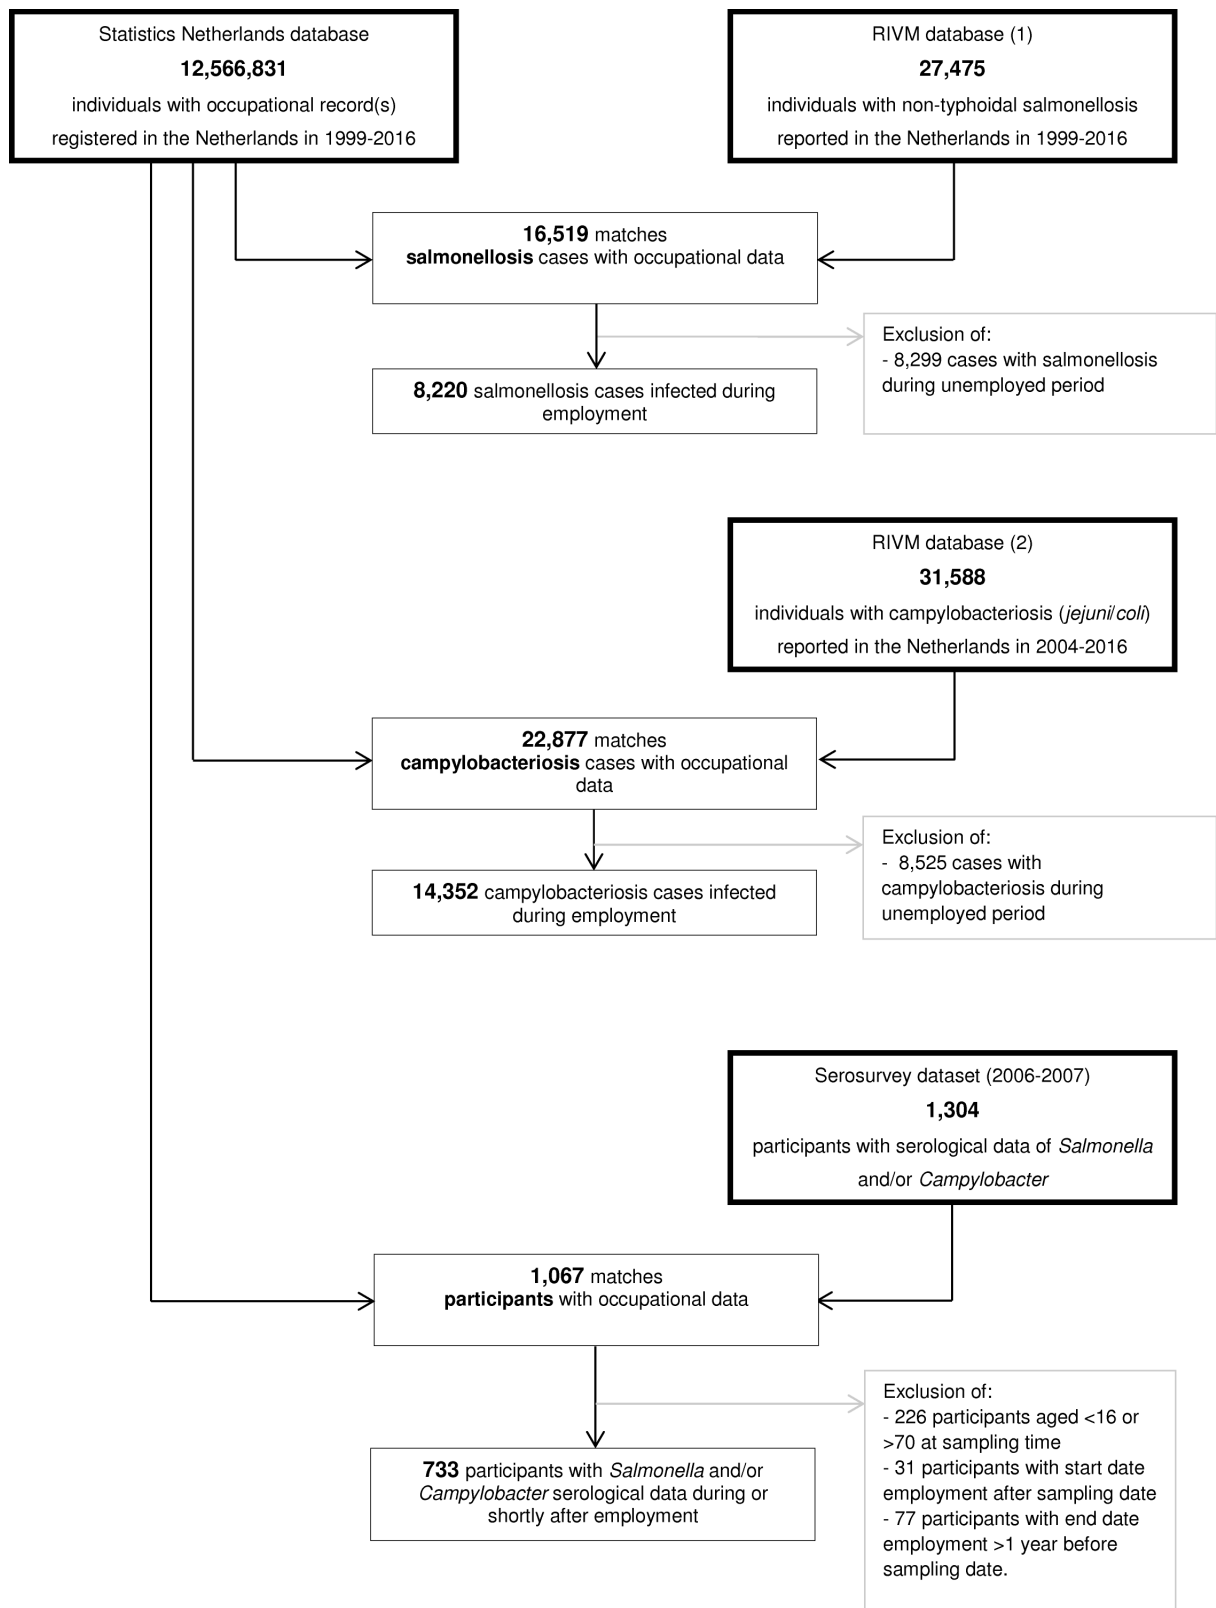

**Figure S1.** Schematic representation of the data management process.

**Table S3.** SIRs of salmonellosis and campylobacteriosis by division

| Div                                                           | Salmonellosis |        |                     | Campylobacteriosis |        |                     |
|---------------------------------------------------------------|---------------|--------|---------------------|--------------------|--------|---------------------|
|                                                               | Obs           | Exp    | SIR (95%CI)         | Obs                | Exp    | SIR (95%CI)         |
| Crop and animal production, hunting                           | 105           | 119.2  | 0.88 (0.73-1.07)    | 141                | 181.2  | 0.78 (0.66-0.92)**  |
| Forestry and logging                                          | 1             | 1.4    | 0.69 (0.09-4.93)    | 1                  | 2.5    | 0.39 (0.06-2.78)    |
| Fishing and aquaculture                                       | 2             | 1.5    | 1.36 (0.34-5.45)    | 5                  | 2.4    | 2.06 (0.86-4.95)    |
| Extraction of crude petroleum and natural gas                 | 6             | 3.4    | 1.75 (0.79-3.89)    | 16                 | 6.3    | 2.54 (1.56-4.15)*** |
| Other mining and quarrying                                    | 5             | 1.9    | 2.61 (1.08-6.26)    | 5                  | 3.5    | 1.42 (0.59-3.41)    |
| Mining support service activities                             | 5             | 2.8    | 1.78 (0.74-4.27)    | 9                  | 5.8    | 1.55 (0.80-2.97)    |
| Manufacture of food products                                  | 126           | 132.8  | 0.95 (0.80-1.13)    | 230                | 225.2  | 1.02 (0.90-1.16)    |
| Manufacture of beverages                                      | 5             | 7.8    | 0.64 (0.27-1.54)    | 8                  | 13.1   | 0.61 (0.31-1.22)    |
| Manufacture of tobacco products                               | 4             | 3.6    | 1.11 (0.42-2.97)    | 7                  | 5.6    | 1.24 (0.59-2.60)    |
| Manufacture of textiles                                       | 16            | 13.4   | 1.19 (0.73-1.94)    | 20                 | 21.0   | 0.95 (0.61-1.47)    |
| Manufacture of wearing apparel                                | 7             | 4.0    | 1.75 (0.84-3.68)    | 4                  | 4.6    | 0.87 (0.33-2.31)    |
| Manufacture of leather (products)                             | 1             | 2.1    | 0.47 (0.07-3.31)    | 3                  | 3.2    | 0.95 (0.31-2.95)    |
| Manufacture of wood/cork etc                                  | 17            | 16.5   | 1.03 (0.64-1.66)    | 22                 | 27.1   | 0.82 (0.53-1.23)    |
| Manufacture of paper (products)                               | 15            | 19.5   | 0.77 (0.46-1.28)    | 51                 | 34.1   | 1.50 (1.14-1.97)**  |
| Printing and reproduction of recorded media                   | 28            | 35.0   | 0.80 (0.55-1.16)    | 44                 | 53.1   | 0.83 (0.62-1.11)    |
| Manufacture of coke and refined petroleum products            | 7             | 5.2    | 1.34 (0.64-2.82)    | 13                 | 10.6   | 1.22 (0.71-2.10)    |
| Manufacture of chemicals                                      | 59            | 42.6   | 1.38 (1.07-1.79)*   | 112                | 81.0   | 1.38 (1.15-1.66)**  |
| Manufacture of basic pharmaceutical products and preparations | 8             | 8.0    | 1.00 (0.50-1.99)    | 15                 | 22.6   | 0.66 (0.40-1.10)    |
| Manufacture of rubber and plastic                             | 38            | 31.1   | 1.22 (0.89-1.68)    | 65                 | 56.0   | 1.16 (0.91-1.48)    |
| Manufacture of other non-metallic mineral products            | 23            | 25.1   | 0.92 (0.61-1.38)    | 45                 | 44.6   | 1.01 (0.75-1.35)    |
| Manufacture of basic metals                                   | 13            | 20.3   | 0.64 (0.37-1.10)    | 38                 | 38.5   | 0.99 (0.72-1.36)    |
| Manufacture of fabricated metal products                      | 99            | 89.2   | 1.11 (0.92-1.35)    | 153                | 158.6  | 0.96 (0.82-1.13)    |
| Manufacture of computer, electronic and optical products      | 33            | 28.6   | 1.15 (0.82-1.62)    | 45                 | 48.3   | 0.93 (0.70-1.25)    |
| Manufacture of electrical equipment                           | 9             | 13.2   | 0.68 (0.36-1.31)    | 43                 | 33.2   | 1.29 (0.96-1.75)    |
| Manufacture of machinery and equipment                        | 59            | 45.5   | 1.30 (1.01-1.67)*   | 114                | 124.7  | 0.91 (0.76-1.10)    |
| Manufacture of motor vehicles                                 | 22            | 16.8   | 1.31 (0.86-1.99)    | 28                 | 34.2   | 0.82 (0.56-1.18)    |
| Manufacture of other transport equipment                      | 12            | 10.9   | 1.11 (0.63-1.95)    | 37                 | 28.2   | 1.31 (0.95-1.81)    |
| Manufacture of furniture                                      | 9             | 15.8   | 0.57 (0.30-1.09)    | 33                 | 33.2   | 0.99 (0.71-1.40)    |
| Other manufacturing                                           | 183           | 115.8  | 1.58 (1.37-1.83)*** | 323                | 230.7  | 1.40 (1.26-1.56)*** |
| Repair/installation of machinery                              | 31            | 22.3   | 1.39 (0.98-1.98)    | 61                 | 62.2   | 0.98 (0.76-1.26)    |
| Electricity, gas, steam and air conditioning supply           | 17            | 23.2   | 0.73 (0.46-1.18)    | 67                 | 43.9   | 1.53 (1.20-1.94)**  |
| Water collection, treatment and supply                        | 4             | 5.3    | 0.75 (0.28-2.01)    | 13                 | 10.0   | 1.30 (0.76-2.24)    |
| Sewerage                                                      | 3             | 4.0    | 0.75 (0.24-2.33)    | 9                  | 7.7    | 1.18 (0.61-2.26)    |
| Waste collection, treatment and disposal activities           | 31            | 23.3   | 1.33 (0.94-1.89)    | 54                 | 44.8   | 1.21 (0.92-1.57)    |
| Remediation activities and other waste management services    | 4             | 1.19   | 3.35 (1.26-8.94)    | 6                  | 2.9    | 2.06 (0.92-4.58)    |
| Construction of buildings                                     | 64            | 64.1   | 1.00 (0.78-1.27)    | 141                | 169.7  | 0.83 (0.70-0.98)*   |
| Civil engineering                                             | 39            | 53.3   | 0.73 (0.53-1.00)    | 97                 | 100.1  | 0.97 (0.79-1.18)    |
| Specialised construction activities                           | 24            | 218.1  | 0.98 (0.86-1.12)    | 370                | 373.9  | 0.99 (0.89-1.10)    |
| Wholesale, retail trade and repair of motor vehicles          | 117           | 136.6  | 0.86 (0.71-1.03)    | 224                | 231.0  | 0.97 (0.85-1.11)    |
| Wholesale trade                                               | 403           | 431.5  | 0.93 (0.85-1.03)    | 716                | 845.7  | 0.85 (0.79-0.91)*** |
| Retail trade                                                  | 1000          | 1041.5 | 0.96 (0.90-1.02)    | 1621               | 1621.3 | 1.00 (0.95-1.05)    |
| Land transport                                                | 157           | 185.1  | 0.85 (0.73-0.99)*   | 365                | 345.0  | 1.06 (0.95-1.17)    |
| Water transport                                               | 23            | 15.5   | 1.48 (0.99-2.23)    | 32                 | 27.8   | 1.15 (0.81-1.63)    |
| Air transport                                                 | 83            | 69.4   | 1.20 (0.96-1.48)    | 43                 | 49.6   | 0.87 (0.64-1.17)    |
| Warehousing and support activities for transportation         | 87            | 74.7   | 1.17 (0.94-1.44)    | 153                | 144.0  | 1.06 (0.91-1.25)    |
| Postal and courier activities                                 | 84            | 85.5   | 0.98 (0.79-1.22)    | 140                | 144.2  | 0.97 (0.82-1.15)    |
| Accommodation                                                 | 102           | 95.5   | 1.06 (0.87-1.28)    | 213                | 155.0  | 1.37 (1.20-1.57)*** |

|                                                                                             |     |       |                     |       |        |                     |
|---------------------------------------------------------------------------------------------|-----|-------|---------------------|-------|--------|---------------------|
| Food and beverage service activities                                                        | 396 | 393.2 | 1.01 (0.91-1.11)    | 641   | 632.0  | 1.01 (0.94-1.10)    |
| Publishing activities                                                                       | 31  | 39.7  | 0.78 (0.55-1.11)    | 69    | 60.0   | 1.15 (0.91-1.46)    |
| Motion picture, video, television programme production etc                                  | 19  | 17.7  | 1.07 (0.68-1.68)    | 20    | 28.2   | 0.71 (0.46-1.10)    |
| Programming and broadcasting activities                                                     | 9   | 7.5   | 1.20 (0.62-2.31)    | 6     | 13.8   | 0.43 (0.20-0.97)    |
| Telecommunications                                                                          | 36  | 42.5  | 0.85 (0.61-1.17)    | 59    | 64.5   | 0.92 (0.71-1.18)    |
| Computer programming, consultancy and related activities                                    | 80  | 91.9  | 0.87 (0.70-1.08)    | 149   | 240.5  | 0.62 (0.53-0.73)*** |
| Information service activities                                                              | 11  | 7.9   | 1.39 (0.77-2.50)    | 17    | 19.6   | 0.87 (0.54-1.40)    |
| Financial service activities, except insurance and pension funding                          | 125 | 145.8 | 0.86 (0.72-1.02)    | 200   | 256.3  | 0.78 (0.68-0.90)*** |
| Insurance, reinsurance and pension funding                                                  | 56  | 63.4  | 0.88 (0.68-1.15)    | 126   | 121.7  | 1.04 (0.87-1.23)    |
| Activities auxiliary to financial services and insurance activities                         | 59  | 58.5  | 1.01 (0.78-1.30)    | 72    | 100.1  | 0.72 (0.57-0.91)**  |
| Real estate activities                                                                      | 83  | 68.8  | 1.21 (0.97-1.50)    | 114   | 128.6  | 0.89 (0.74-1.07)    |
| Legal and accounting activities                                                             | 133 | 139.7 | 0.95 (0.80-1.13)    | 220   | 241.0  | 0.91 (0.80-1.04)    |
| Activities of head offices; management consultancy activities                               | 134 | 141.5 | 0.95 (0.80-1.12)    | 191   | 279.0  | 0.68 (0.59-0.79)*** |
| Architectural and engineering activities; technical testing and analysis                    | 79  | 102.8 | 0.77 (0.62-0.96)*   | 162   | 191.3  | 0.85 (0.73-0.99)*   |
| Scientific research and development                                                         | 34  | 34.8  | 0.98 (0.70-1.37)    | 49    | 63.0   | 0.78 (0.59-1.03)    |
| Advertising and market research                                                             | 61  | 62.7  | 0.97 (0.76-1.25)    | 76    | 93.4   | 0.81 (0.65-1.02)    |
| Other professional, scientific and technical activities                                     | 12  | 20.0  | 0.60 (0.34-1.06)    | 36    | 44.1   | 0.82 (0.59-1.13)    |
| Veterinary activities                                                                       | 15  | 7.4   | 2.03 (1.22-3.37)**  | 26    | 13.3   | 1.96 (1.33-2.87)**  |
| Rental and leasing activities                                                               | 37  | 30.3  | 1.22 (0.88-1.68)    | 48    | 53.4   | 0.90 (0.68-1.19)    |
| Employment activities                                                                       | 640 | 672.8 | 0.95 (0.88-1.03)    | 1,170 | 1106.3 | 1.05 (1.00-1.12)    |
| Travel agency, tour operator reservation service etc                                        | 28  | 28.5  | 0.98 (0.68-1.42)    | 46    | 44.1   | 1.04 (0.78-1.39)    |
| Security and investigation activities                                                       | 34  | 33.1  | 1.03 (0.73-1.44)    | 62    | 64.8   | 0.96 (0.75-1.23)    |
| Services to buildings and landscape activities                                              | 184 | 176.2 | 1.04 (0.90-1.21)    | 247   | 287.5  | 0.86 (0.76-0.97)*   |
| Office administrative, office support etc                                                   | 30  | 32.4  | 0.93 (0.65-1.33)    | 60    | 67.7   | 0.89 (0.69-1.14)    |
| Public administration and defence; compulsory social security                               | 513 | 506.6 | 1.01 (0.93-1.10)    | 987   | 944.0  | 1.05 (0.98-1.11)    |
| Education                                                                                   | 428 | 502.3 | 0.85 (0.78-0.94)**  | 857   | 934.6  | 0.92 (0.86-0.98)*   |
| Human health activities                                                                     | 550 | 492   | 1.12 (1.03-1.21)*   | 1,123 | 918.6  | 1.22 (1.15-1.30)*** |
| Residential care activities                                                                 | 559 | 478.3 | 1.17 (1.08-1.27)*** | 981   | 835.4  | 1.17 (1.10-1.25)*** |
| Social work activities without accommodation                                                | 362 | 331.6 | 1.09 (0.98-1.21)    | 686   | 620.5  | 1.11 (1.03-1.19)**  |
| Creative, arts and entertainment activities                                                 | 20  | 24.5  | 0.82 (0.53-1.26)    | 47    | 47.5   | 0.99 (0.74-1.32)    |
| Libraries, archives, museums and other cultural activities                                  | 26  | 22.5  | 1.15 (0.79-1.70)    | 50    | 42.1   | 1.19 (0.90-1.57)    |
| Gambling and betting activities                                                             | 8   | 9.0   | 0.89 (0.44-1.78)    | 19    | 15.8   | 1.20 (0.77-1.88)    |
| Sports activities and amusement and recreation activities                                   | 95  | 84.7  | 1.12 (0.92-1.37)    | 157   | 152.9  | 1.03 (0.88-1.20)    |
| Activities of membership organizations                                                      | 74  | 81.1  | 0.91 (0.73-1.15)    | 113   | 140.0  | 0.81 (0.67-0.97)*   |
| Repair of computers and personal/household goods                                            | 3   | 5.6   | 0.54 (0.17-1.67)    | 9     | 10.7   | 0.84 (0.44-1.62)    |
| Other personal service activities                                                           | 75  | 79.7  | 0.94 (0.75-1.18)    | 144   | 131.1  | 1.10 (0.93-1.29)    |
| Activities of households as employers of domestic personnel                                 | 26  | 23.2  | 1.12 (0.76-1.65)    | 82    | 57.8   | 1.42 (1.14-1.76)**  |
| Undifferentiated goods- and services-producing activities of private households for own use | 0   | 0.003 | -                   | 0     | 0.01   | -                   |
| Activities of extraterritorial organizations and bodies                                     | 0   | 1.6   | -                   | 4     | 3.6    | 1.12 (0.42-2.99)    |

Obs: observed numbers; Exp: expected numbers; \*p<0.05; \*\*p<0.01; \*\*\*p<0.001.

**Table S4.** SIRs of salmonellosis and campylobacteriosis in the 'veterinary activities' sector

| Gender                  | Salmonellosis |      |                     | Campylobacteriosis |      |                    |
|-------------------------|---------------|------|---------------------|--------------------|------|--------------------|
|                         | Obs           | Exp  | SIR (95%CI)         | Obs                | Exp  | SIR (95%CI)        |
| Male                    | 3             | 0.9  | 3.26 (1.05-10.09)*  | 4                  | 1.8  | 2.22 (0.84-5.93)   |
| Female                  | 12            | 6.5  | 1.86 (1.05-3.27)*   | 22                 | 11.5 | 1.91 (1.26-2.91)** |
| Serovar/species         |               |      |                     |                    |      |                    |
| <i>S. Typhimurium</i>   | 9             | 1.82 | 4.94 (2.57-9.50)*** | -                  | -    | -                  |
| <i>S. Enteritidis</i>   | 2             | 2.8  | 0.71 (0.18-2.85)    | -                  | -    | -                  |
| <i>Salmonella</i> other | 4             | 2.8  | 1.45 (0.54-3.86)    | -                  | -    | -                  |
| <i>C. jejuni</i>        | -             | -    | -                   | 24                 | 12.4 | 1.93 (1.29-2.88)** |
| <i>C. coli</i>          | -             | -    | -                   | 2                  | 0.9  | 2.30 (0.58-9.20)   |
| Age group               |               |      |                     |                    |      |                    |
| 16-19 years             | 1             | 0.2  | 4.34 (0.62-30.82)   | 0                  | 0.3  | -                  |
| 20-29 years             | 10            | 4.1  | 2.44 (1.31-4.54)**  | 14                 | 6.7  | 2.10 (1.24-3.54)** |
| 30-39 years             | 0             | 1.6  | -                   | 5                  | 2.9  | 1.70 (0.71-4.08)   |
| 40-49 years             | 2             | 0.8  | 2.36 (0.59-9.43)    | 3                  | 1.8  | 1.62 (0.52-5.03)   |
| ≥50 years               | 2             | 0.6  | 3.12 (0.78-12.46)   | 4                  | 1.6  | 2.57 (0.96-6.83)   |

Obs: observed numbers; Exp: expected numbers; \*p&lt;0.05; \*\*p&lt;0.01; \*\*\*p&lt;0.001.

**Table S5.** SIRs of salmonellosis and campylobacteriosis in the 'manufacture of chemicals' sector

| Gender                  | Salmonellosis |      |                   | Campylobacteriosis |      |                     |
|-------------------------|---------------|------|-------------------|--------------------|------|---------------------|
|                         | Obs           | Exp  | SIR (95%CI)       | Obs                | Exp  | SIR (95%CI)         |
| Male                    | 48            | 33.9 | 1.42 (1.07-1.88)* | 96                 | 66.5 | 1.44 (1.18-1.76)*** |
| Female                  | 11            | 8.7  | 1.26 (0.70-2.27)  | 16                 | 14.5 | 1.10 (0.68-1.80)    |
| Serovar/species         |               |      |                   |                    |      |                     |
| <i>S. Typhimurium</i>   | 9             | 9.6  | 0.94 (0.49-1.80)  | -                  | -    | -                   |
| <i>S. Enteritidis</i>   | 26            | 17.6 | 1.48 (1.01-2.17)* | -                  | -    | -                   |
| <i>Salmonella</i> other | 24            | 15.4 | 1.55 (1.04-2.32)* | -                  | -    | -                   |
| <i>C. jejuni</i>        | -             | -    | -                 | 101                | 75.5 | 1.34 (1.10-1.63)**  |
| <i>C. coli</i>          | -             | -    | -                 | 11                 | 5.6  | 1.97 (1.09-3.56)*   |
| Age group               |               |      |                   |                    |      |                     |
| 16-19 years             | 0             | 0.7  | -                 | 0                  | 0.9  | -                   |
| 20-29 years             | 9             | 8.7  | 1.03 (0.54-1.98)  | 15                 | 11.5 | 1.30 (0.78-2.16)    |
| 30-39 years             | 13            | 10.2 | 1.28 (0.74-2.21)  | 24                 | 14.9 | 1.61 (1.08-2.40)*   |
| 40-49 years             | 18            | 11.3 | 1.59 (1.00-2.52)* | 32                 | 23.8 | 1.35 (0.95-1.90)    |
| ≥50 years               | 19            | 11.7 | 1.63 (1.04-2.55)* | 41                 | 29.9 | 1.37 (1.01-1.86)*   |

Obs: observed numbers; Exp: expected numbers; \*p&lt;0.05; \*\*p&lt;0.01; \*\*\*p&lt;0.001.

**Table S6.** SIRs of salmonellosis and campylobacteriosis in the 'manufacture of paper (products)' sector

| Gender                  | Salmonellosis |      |                  | Campylobacteriosis |      |                     |
|-------------------------|---------------|------|------------------|--------------------|------|---------------------|
|                         | Obs           | Exp  | SIR (95%CI)      | Obs                | Exp  | SIR (95%CI)         |
| Male                    | 15            | 16.0 | 0.94 (0.57-1.56) | 49                 | 28.9 | 1.70 (1.28-2.24)*** |
| Female                  | 0             | 3.5  | -                | 2                  | 5.2  | 0.38 (0.10-1.53)    |
| Serovar/species         |               |      |                  |                    |      |                     |
| <i>S. Typhimurium</i>   | 7             | 4.3  | 1.61 (0.77-3.38) | -                  | -    | -                   |
| <i>S. Enteritidis</i>   | 3             | 8.3  | 0.36 (0.12-1.12) | -                  | -    | -                   |
| <i>Salmonella</i> other | 5             | 6.9  | 0.73 (0.30-1.75) | -                  | -    | -                   |
| <i>C. jejuni</i>        | -             | -    | -                | 50                 | 31.7 | 1.58 (1.19-2.08)**  |
| <i>C. coli</i>          | -             | -    | -                | 1                  | 2.4  | 0.42 (0.06-2.99)    |
| Age group               |               |      |                  |                    |      |                     |
| 16-19 years             | 0             | 0.5  | -                | 0                  | 0.5  | -                   |
| 20-29 years             | 2             | 3.9  | 0.51 (0.13-2.03) | 4                  | 4.4  | 0.90 (0.34-2.40)    |
| 30-39 years             | 2             | 4.8  | 0.42 (0.10-1.66) | 9                  | 6.1  | 1.46 (0.76-2.81)    |
| 40-49 years             | 4             | 5.3  | 0.75 (0.28-2.01) | 19                 | 10.9 | 1.75 (1.11-2.74)*   |
| ≥50 years               | 7             | 4.9  | 1.42 (0.68-2.99) | 19                 | 12.1 | 1.57 (1.00-2.47)*   |

Obs: observed numbers; Exp: expected numbers; \*p&lt;0.05; \*\*p&lt;0.01; \*\*\*p&lt;0.001.

**Table S7.** SIRs of salmonellosis and campylobacteriosis in the 'extraction of crude petroleum and natural gas' sector

| Gender | Salmonellosis |     |             | Campylobacteriosis |     |             |
|--------|---------------|-----|-------------|--------------------|-----|-------------|
|        | Obs           | Exp | SIR (95%CI) | Obs                | Exp | SIR (95%CI) |

|                         |   |      |                   |    |      |                     |
|-------------------------|---|------|-------------------|----|------|---------------------|
| Male                    | 4 | 2.9  | 1.38 (0.51-3.67)  | 14 | 5.4  | 2.59 (1.54-4.38)*** |
| Female                  | 2 | 0.5  | 3.78 (0.95-15.12) | 2  | 0.9  | 2.22 (0.56-8.89)    |
| <b>Serovar/species</b>  |   |      |                   |    |      |                     |
| <i>S. Typhimurium</i>   | 0 | 0.7  | -                 | -  | -    | -                   |
| <i>S. Enteritidis</i>   | 4 | 1.4  | 2.76 (1.03-7.37)* | -  | -    | -                   |
| <i>Salmonella</i> other | 2 | 1.2  | 1.60 (0.40-6.41)  | -  | -    | -                   |
| <i>C. jejuni</i>        | - | -    | -                 | 16 | 5.9  | 2.72 (1.67-4.45)*** |
| <i>C. coli</i>          | - | -    | -                 | 0  | 0.4  | -                   |
| <b>Age group</b>        |   |      |                   |    |      |                     |
| 16-19 years             | 0 | 0.01 | -                 | 0  | 0.01 | -                   |
| 20-29 years             | 0 | 0.5  | -                 | 2  | 0.8  | 2.66 (0.66-10.62)   |
| 30-39 years             | 1 | 0.7  | 1.42 (0.20-10.08) | 3  | 1.1  | 2.65 (0.86-8.23)    |
| 40-49 years             | 3 | 1.1  | 2.72 (0.88-8.43)  | 4  | 1.7  | 2.42 (0.91-6.45)    |
| ≥50 years               | 2 | 1.1  | 1.82 (0.45-7.27)  | 7  | 2.8  | 2.54 (1.21-5.33)*   |

Obs: observed numbers; Exp: expected numbers; \*p<0.05; \*\*p<0.01; \*\*\*p<0.001.

**Table S8.** SIRs of salmonellosis and campylobacteriosis in the 'electricity, gas, steam and air conditioning supply' sector

| Gender                  | Salmonellosis |      |                  | Campylobacteriosis |      |                     |
|-------------------------|---------------|------|------------------|--------------------|------|---------------------|
|                         | Obs           | Exp  | SIR (95%CI)      | Obs                | Exp  | SIR (95%CI)         |
| Male                    | 10            | 17.9 | 0.56 (0.30-1.04) | 52                 | 34.1 | 1.53 (1.16-2.00)**  |
| Female                  | 7             | 5.3  | 1.32 (0.63-2.77) | 15                 | 9.8  | 1.53 (0.92-2.54)    |
| <b>Serovar/species</b>  |               |      |                  |                    |      |                     |
| <i>S. Typhimurium</i>   | 3             | 5.2  | 0.58 (0.19-1.80) | -                  | -    | -                   |
| <i>S. Enteritidis</i>   | 7             | 9.3  | 0.75 (0.36-1.58) | -                  | -    | -                   |
| <i>Salmonella</i> other | 7             | 8.7  | 0.81 (0.39-1.70) | -                  | -    | -                   |
| <i>C. jejuni</i>        | -             | -    | -                | 60                 | 41.0 | 1.46 (1.14-1.89)**  |
| <i>C. coli</i>          | -             | -    | -                | 7                  | 2.9  | 2.41 (1.15-5.05)*   |
| <b>Age group</b>        |               |      |                  |                    |      |                     |
| 16-19 years             | 0             | 0.2  | -                | 0                  | 0.3  | -                   |
| 20-29 years             | 5             | 4.5  | 1.10 (0.46-2.65) | 9                  | 7.7  | 1.18 (0.61-2.26)    |
| 30-39 years             | 6             | 4.7  | 1.29 (0.58-2.87) | 15                 | 8.1  | 1.84 (1.11-3.06)*   |
| 40-49 years             | 3             | 5.8  | 0.52 (0.17-1.60) | 10                 | 9.9  | 1.01 (0.54-1.87)    |
| ≥50 years               | 3             | 7.9  | 0.38 (0.12-1.17) | 33                 | 17.9 | 1.85 (1.31-2.60)*** |

Obs: observed numbers; Exp: expected numbers; \*p<0.05; \*\*p<0.01; \*\*\*p<0.001.

**Table S9.** SIRs of salmonellosis and campylobacteriosis in the 'manufacturing of machinery and equipment' sector

| Gender                  | Salmonellosis |      |                    | Campylobacteriosis |       |                  |
|-------------------------|---------------|------|--------------------|--------------------|-------|------------------|
|                         | Obs           | Exp  | SIR (95%CI)        | Obs                | Exp   | SIR (95%CI)      |
| Male                    | 55            | 39.2 | 1.40 (1.08-1.83)*  | 101                | 110.1 | 0.92 (0.75-1.11) |
| Female                  | 4             | 6.2  | 0.64 (0.24-1.71)   | 13                 | 14.6  | 0.89 (0.52-1.53) |
| <b>Serovar/species</b>  |               |      |                    |                    |       |                  |
| <i>S. Typhimurium</i>   | 18            | 12.5 | 1.44 (0.91-2.29)   | -                  | -     | -                |
| <i>S. Enteritidis</i>   | 19            | 15.3 | 1.24 (0.79-1.95)   | -                  | -     | -                |
| <i>Salmonella</i> other | 22            | 17.7 | 1.24 (0.82-1.89)   | -                  | -     | -                |
| <i>C. jejuni</i>        | -             | -    | -                  | 103                | 116.2 | 0.89 (0.73-1.08) |
| <i>C. coli</i>          | -             | -    | -                  | 11                 | 8.5   | 1.29 (0.71-2.33) |
| <b>Age group</b>        |               |      |                    |                    |       |                  |
| 16-19 years             | 0             | 2.3  | -                  | 4                  | 4.0   | 1.00 (0.38-2.67) |
| 20-29 years             | 18            | 12.8 | 1.41 (0.89-2.24)   | 20                 | 24.3  | 0.82 (0.53-1.28) |
| 30-39 years             | 15            | 9.5  | 1.58 (0.95-2.62)   | 24                 | 23.8  | 1.01 (0.67-1.50) |
| 40-49 years             | 20            | 9.8  | 2.04 (1.31-3.16)** | 26                 | 32.4  | 0.80 (0.55-1.18) |
| ≥50 years               | 6             | 11.1 | 0.54 (0.24-1.21)   | 40                 | 40.2  | 1.00 (0.73-1.36) |

Obs: observed numbers; Exp: expected numbers; \*p<0.05; \*\*p<0.01; \*\*\*p<0.001.

**Table S10.** SIRs of salmonellosis and campylobacteriosis in the 'other manufacturing' sector

| Gender                 | Salmonellosis |      |                     | Campylobacteriosis |       |                     |
|------------------------|---------------|------|---------------------|--------------------|-------|---------------------|
|                        | Obs           | Exp  | SIR (95%CI)         | Obs                | Exp   | SIR (95%CI)         |
| Male                   | 127           | 79.1 | 1.61 (1.35-1.91)*** | 233                | 164.2 | 1.42 (1.25-1.61)*** |
| Female                 | 56            | 36.8 | 1.52 (1.17-1.98)**  | 90                 | 66.5  | 1.35 (1.10-1.66)**  |
| <b>Serovar/species</b> |               |      |                     |                    |       |                     |
| <i>S. Typhimurium</i>  | 56            | 26.3 | 2.13 (1.64-2.76)*** | -                  | -     | -                   |

|                  |    |      |                     |     |       |                     |
|------------------|----|------|---------------------|-----|-------|---------------------|
| S. Enteritidis   | 58 | 46.8 | 1.24 (0.96-1.60)    | -   | -     | -                   |
| Salmonella other | 69 | 42.7 | 1.62 (1.28-2.05)*** | -   | -     | -                   |
| C. jejuni        | -  | -    | -                   | 300 | 214.7 | 1.40 (1.25-1.56)*** |
| C. coli          | -  | -    | -                   | 23  | 16.0  | 1.44 (0.95-2.16)    |

## Age group

|             |    |      |                     |     |       |                     |
|-------------|----|------|---------------------|-----|-------|---------------------|
| 16-19 years | 3  | 2.4  | 1.23 (0.40-3.81)    | 1   | 2.6   | 0.39 (0.05-2.75)    |
| 20-29 years | 26 | 24.0 | 1.08 (0.74-1.59)    | 20  | 34.5  | 0.58 (0.37-0.90)*   |
| 30-39 years | 27 | 19.1 | 1.41 (0.97-2.06)    | 51  | 31.3  | 1.63 (1.24-2.14)**  |
| 40-49 years | 46 | 28.0 | 1.64 (1.23-2.20)**  | 101 | 55.3  | 1.83 (1.50-2.22)*** |
| ≥50 years   | 81 | 42.3 | 1.92 (1.54-2.38)*** | 150 | 107.0 | 1.40 (1.19-1.64)*** |

Obs: observed numbers; Exp: expected numbers; \*p<0.05; \*\*p<0.01; \*\*\*p<0.001.

**Table S11.** SIRs of salmonellosis and campylobacteriosis in the 'human health activities' sector

| Gender | Salmonellosis |       |                   | Campylobacteriosis |       |                     |
|--------|---------------|-------|-------------------|--------------------|-------|---------------------|
|        | Obs           | Exp   | SIR (95%CI)       | Obs                | Exp   | SIR (95%CI)         |
| Male   | 123           | 102.8 | 1.20 (1.00-1.43)* | 262                | 213.4 | 1.23 (1.09-1.39)**  |
| Female | 427           | 389.9 | 1.10 (1.00-1.20)  | 861                | 705.2 | 1.22 (1.14-1.31)*** |

## Serovar/species

|                  |     |       |                   |       |       |                     |
|------------------|-----|-------|-------------------|-------|-------|---------------------|
| S.Typhimurium    | 121 | 113.5 | 1.07 (0.89-1.27)  | -     | -     | -                   |
| S. Enteritidis   | 212 | 193.4 | 1.10 (0.96-1.25)  | -     | -     | -                   |
| Salmonella other | 217 | 185.8 | 1.17 (1.02-1.33)* | -     | -     | -                   |
| C. jejuni        | -   | -     | -                 | 1,055 | 855.4 | 1.23 (1.16-1.31)*** |
| C. coli          | -   | -     | -                 | 68    | 63.3  | 1.08 (0.85-1.36)    |

## Age group

|             |     |       |                   |     |       |                     |
|-------------|-----|-------|-------------------|-----|-------|---------------------|
| 16-19 years | 27  | 19.2  | 1.41 (0.96-2.05)  | 32  | 26.0  | 1.23 (0.87-1.74)    |
| 20-29 years | 205 | 176.4 | 1.16 (1.01-1.33)* | 354 | 281.0 | 1.26 (1.14-1.40)*** |
| 30-39 years | 92  | 93.7  | 0.98 (0.80-1.20)  | 182 | 166.4 | 1.09 (0.95-1.26)    |
| 40-49 years | 107 | 98.9  | 1.08 (0.89-1.31)  | 244 | 200.2 | 1.22 (1.07-1.38)**  |
| ≥50 years   | 119 | 104.4 | 1.14 (0.95-1.36)  | 311 | 245.0 | 1.27 (1.14-1.42)*** |

Obs: observed numbers; Exp: expected numbers; \*p<0.05; \*\*p<0.01; \*\*\*p<0.001.

**Table S12.** SIRs of salmonellosis and campylobacteriosis in the 'residential care activities' sector

| Gender | Salmonellosis |       |                    | Campylobacteriosis |       |                     |
|--------|---------------|-------|--------------------|--------------------|-------|---------------------|
|        | Obs           | Exp   | SIR (95%CI)        | Obs                | Exp   | SIR (95%CI)         |
| Male   | 81            | 60.2  | 1.34 (1.08-1.67)** | 153                | 116.6 | 1.31 (1.12-1.54)**  |
| Female | 478           | 418.1 | 1.14 (1.05-1.25)** | 828                | 718.8 | 1.15 (1.08-1.23)*** |

## Serovar/species

|                  |     |       |                    |     |       |                     |
|------------------|-----|-------|--------------------|-----|-------|---------------------|
| S.Typhimurium    | 144 | 113.9 | 1.26 (1.07-1.49)** | -   | -     | -                   |
| S. Enteritidis   | 220 | 188.8 | 1.17 (1.02-1.33)*  | -   | -     | -                   |
| Salmonella other | 195 | 175.6 | 1.11 (0.96-1.28)   | -   | -     | -                   |
| C. jejuni        | -   | -     | -                  | 912 | 778.2 | 1.17 (1.10-1.25)*** |
| C. coli          | -   | -     | -                  | 69  | 57.3  | 1.20 (0.95-1.53)    |

## Age group

|             |     |       |                  |     |       |                     |
|-------------|-----|-------|------------------|-----|-------|---------------------|
| 16-19 years | 57  | 45.7  | 1.25 (0.96-1.62) | 67  | 64.4  | 1.04 (0.82-1.32)    |
| 20-29 years | 214 | 176.5 | 1.21 (1.06-1.39) | 329 | 271.2 | 1.21 (1.09-1.35)*** |
| 30-39 years | 82  | 72.4  | 1.13 (0.91-1.41) | 155 | 120.7 | 1.28 (1.10-1.50)**  |
| 40-49 years | 98  | 88.6  | 1.11 (0.91-1.35) | 196 | 169.0 | 1.16 (1.01-1.33)*   |
| ≥50 years   | 108 | 95.0  | 1.14 (0.94-1.37) | 234 | 210.1 | 1.11 (0.98-1.27)    |

Obs: observed numbers; Exp: expected numbers; \*p<0.05; \*\*p<0.01; \*\*\*p<0.001.

**Table S13.** SIRs of salmonellosis and campylobacteriosis in the 'social work activities without accommodation' sector

| Gender | Salmonellosis |       |                   | Campylobacteriosis |       |                   |
|--------|---------------|-------|-------------------|--------------------|-------|-------------------|
|        | Obs           | Exp   | SIR (95%CI)       | Obs                | Exp   | SIR (95%CI)       |
| Male   | 27            | 31.3  | 0.86 (0.59-1.26)  | 67                 | 61.9  | 1.08 (0.85-1.38)  |
| Female | 335           | 300.3 | 1.12 (1.00-1.24)* | 619                | 558.6 | 1.10 (1.02-1.20)* |

## Serovar/species

|                  |     |       |                  |     |       |                   |
|------------------|-----|-------|------------------|-----|-------|-------------------|
| S.Typhimurium    | 95  | 77.8  | 1.22 (1.00-1.49) | -   | -     | -                 |
| S. Enteritidis   | 135 | 127.7 | 1.06 (0.89-1.25) | -   | -     | -                 |
| Salmonella other | 132 | 126.1 | 1.05 (0.88-1.24) | -   | -     | -                 |
| C. jejuni        | -   | -     | -                | 636 | 577.7 | 1.10 (1.02-1.19)* |
| C. coli          | -   | -     | -                | 50  | 42.8  | 1.17 (0.89-1.54)  |

## Age group

|             |     |       |                     |     |       |                  |
|-------------|-----|-------|---------------------|-----|-------|------------------|
| 16-19 years | 37  | 18.7  | 1.98 (1.43-2.73)*** | 24  | 29.0  | 0.83 (0.56-1.24) |
| 20-29 years | 128 | 127.2 | 1.01 (0.85-1.20)    | 229 | 216.6 | 1.06 (0.93-1.20) |



|             |    |      |                   |     |       |                    |
|-------------|----|------|-------------------|-----|-------|--------------------|
| 30-39 years | 67 | 52.2 | 1.28 (1.01-1.63)* | 102 | 97.9  | 1.04 (0.86-1.26)   |
| 40-49 years | 59 | 61.8 | 0.95 (0.74-1.23)  | 155 | 124.5 | 1.25 (1.06-1.46)** |
| ≥50 years   | 71 | 71.7 | 0.99 (0.78-1.25)  | 176 | 152.5 | 1.15 (1.00-1.34)   |

Obs: observed numbers; Exp: expected numbers; \*p<0.05; \*\*p<0.01; \*\*\*p<0.001.

**Table S14.** SIRs of salmonellosis and campylobacteriosis in the 'accommodation' sector

| Gender                  | Salmonellosis |      |                   | Campylobacteriosis |       |                     |
|-------------------------|---------------|------|-------------------|--------------------|-------|---------------------|
|                         | Obs           | Exp  | SIR (95%CI)       | Obs                | Exp   | SIR (95%CI)         |
| Male                    | 53            | 39.3 | 1.35 (1.03-1.76)* | 103                | 63.7  | 1.62 (1.33-1.96)*** |
| Female                  | 49            | 57.2 | 0.86 (0.65-1.13)  | 110                | 91.3  | 1.20 (1.00-1.45)    |
| Serovar/species         |               |      |                   |                    |       |                     |
| <i>S.</i> Typhimurium   | 32            | 28.6 | 1.12 (0.79-1.58)  | -                  | -     | -                   |
| <i>S.</i> Enteritidis   | 45            | 37.2 | 1.21 (0.90-1.62)  | -                  | -     | -                   |
| <i>Salmonella</i> other | 25            | 30.8 | 0.81 (0.55-1.20)  | -                  | -     | -                   |
| <i>C.</i> jejuni        | -             | -    | -                 | 202                | 144.9 | 1.39 (1.21-1.60)*** |
| <i>C.</i> coli          | -             | -    | -                 | 11                 | 10.2  | 1.08 (0.60-1.95)    |
| Age group               |               |      |                   |                    |       |                     |
| 16-19 years             | 26            | 24.6 | 1.06 (0.72-1.55)  | 51                 | 33.2  | 1.54 (1.17-2.02)**  |
| 20-29 years             | 54            | 46.1 | 1.17 (0.90-1.53)  | 100                | 70.5  | 1.42 (1.17-1.73)*** |
| 30-39 years             | 9             | 10.2 | 0.88 (0.46-1.70)  | 17                 | 17.5  | 0.97 (0.61-1.57)    |
| 40-49 years             | 7             | 7.8  | 0.90 (0.43-1.88)  | 21                 | 16.1  | 1.30 (0.85-2.00)    |
| ≥50 years               | 6             | 7.8  | 0.76 (0.34-1.70)  | 24                 | 17.8  | 1.35 (0.90-2.01)    |

Obs: observed numbers; Exp: expected numbers; \*p<0.05; \*\*p<0.01; \*\*\*p<0.001.

**Table S15.** SIRs of salmonellosis and campylobacteriosis in the 'activities of households as employers of domestic personnel' sector

| Gender                  | Salmonellosis |      |                   | Campylobacteriosis |      |                    |
|-------------------------|---------------|------|-------------------|--------------------|------|--------------------|
|                         | Obs           | Exp  | SIR (95%CI)       | Obs                | Exp  | SIR (95%CI)        |
| Male                    | 1             | 4.4  | 0.23 (0.03-1.61)  | 15                 | 12.7 | 1.18 (0.71-1.95)   |
| Female                  | 25            | 18.8 | 1.33 (0.90-1.97)  | 67                 | 45.1 | 1.49 (1.17-1.89)** |
| Serovar/species         |               |      |                   |                    |      |                    |
| <i>S.</i> Typhimurium   | 3             | 6.0  | 0.50 (0.17-1.56)  | -                  | -    | -                  |
| <i>S.</i> Enteritidis   | 9             | 7.0  | 1.29 (0.67-2.47)  | -                  | -    | -                  |
| <i>Salmonella</i> other | 14            | 10.2 | 1.37 (0.81-2.31)  | -                  | -    | -                  |
| <i>C.</i> jejuni        | -             | -    | -                 | 76                 | 53.9 | 1.41 (1.13-1.77)** |
| <i>C.</i> coli          | -             | -    | -                 | 6                  | 4.0  | 1.51 (0.68-3.37)   |
| Age group               |               |      |                   |                    |      |                    |
| 16-19 years             | 4             | 1.7  | 2.36 (0.89-6.29)  | 4                  | 3.2  | 1.24 (0.46-3.29)   |
| 20-29 years             | 4             | 8.4  | 0.48 (0.18-1.27)  | 18                 | 16.9 | 1.06 (0.67-1.69)   |
| 30-39 years             | 4             | 2.9  | 1.38 (0.52-3.69)  | 12                 | 7.4  | 1.62 (0.92-2.86)   |
| 40-49 years             | 8             | 4.0  | 2.02 (1.01-4.04)* | 23                 | 12.7 | 1.81 (1.20-2.72)** |
| ≥50 years               | 6             | 6.3  | 0.95 (0.43-2.12)  | 25                 | 17.6 | 1.42 (0.96-2.10)   |

Obs: observed numbers; Exp: expected numbers; \*p<0.05; \*\*p<0.01; \*\*\*p<0.001.

**Table S16.** SIRs of salmonellosis and campylobacteriosis in the 'architectural and engineering activities; technical testing and analysis' sector

| Gender                  | Salmonellosis |      |                   | Campylobacteriosis |       |                    |
|-------------------------|---------------|------|-------------------|--------------------|-------|--------------------|
|                         | Obs           | Exp  | SIR (95%CI)       | Obs                | Exp   | SIR (95%CI)        |
| Male                    | 59            | 76.8 | 0.77 (0.59-0.99)* | 122                | 147.1 | 0.83 (0.69-0.99)*  |
| Female                  | 20            | 26.0 | 0.77 (0.50-1.19)  | 40                 | 44.2  | 0.90 (0.66-1.23)   |
| Serovar/species         |               |      |                   |                    |       |                    |
| <i>S.</i> Typhimurium   | 17            | 25.2 | 0.67 (0.42-1.08)  | -                  | -     | -                  |
| <i>S.</i> Enteritidis   | 33            | 40.8 | 0.81 (0.58-1.14)  | -                  | -     | -                  |
| <i>Salmonella</i> other | 29            | 36.8 | 0.79 (0.55-1.13)  | -                  | -     | -                  |
| <i>C.</i> jejuni        | -             | -    | -                 | 148                | 178.4 | 0.83 (0.71-0.97)*  |
| <i>C.</i> coli          | -             | -    | -                 | 14                 | 13.0  | 1.08 (0.64-1.82)   |
| Age group               |               |      |                   |                    |       |                    |
| 16-19 years             | 3             | 3.0  | 1.00 (0.32-3.12)  | 5                  | 3.6   | 1.37 (0.57-3.30)   |
| 20-29 years             | 33            | 37.4 | 0.88 (0.63-1.24)  | 45                 | 52.1  | 0.86 (0.64-1.16)   |
| 30-39 years             | 16            | 24.8 | 0.65 (0.40-1.05)  | 42                 | 44.1  | 0.95 (0.70-1.29)   |
| 40-49 years             | 13            | 17.9 | 0.73 (0.42-1.25)  | 21                 | 39.9  | 0.53 (0.34-0.81)** |
| ≥50 years               | 14            | 19.8 | 0.71 (0.42-1.19)  | 49                 | 51.6  | 0.95 (0.72-1.26)   |

Obs: observed numbers; Exp: expected numbers; \*p<0.05; \*\*p<0.01; \*\*\*p<0.001.

**Table S17.** SIRs of salmonellosis and campylobacteriosis in the 'computer programming and consultancy' sector

| Gender           | Salmonellosis |      |                  | Campylobacteriosis |       |                     |
|------------------|---------------|------|------------------|--------------------|-------|---------------------|
|                  | Obs           | Exp  | SIR (95%CI)      | Obs                | Exp   | SIR (95%CI)         |
| Male             | 59            | 71.5 | 0.82 (0.64-1.06) | 122                | 191.9 | 0.64 (0.53-0.76)*** |
| Female           | 21            | 20.4 | 1.03 (0.67-1.58) | 27                 | 48.5  | 0.56 (0.38-0.81)**  |
| Serovar/species  |               |      |                  |                    |       |                     |
| S.Typhimurium    | 20            | 25.2 | 0.80 (0.51-1.23) | -                  | -     | -                   |
| S. Enteritidis   | 22            | 30.9 | 0.71 (0.46-1.08) | -                  | -     | -                   |
| Salmonella other | 38            | 35.9 | 1.06 (0.77-1.46) | -                  | -     | -                   |
| C. jejuni        | -             | -    | -                | 136                | 224.4 | 0.61 (0.51-0.72)*** |
| C. coli          | -             | -    | -                | 13                 | 16.1  | 0.81 (0.47-1.39)    |
| Age group        |               |      |                  |                    |       |                     |
| 16-19 years      | 2             | 2.0  | 0.98 (0.24-3.91) | 2                  | 3.6   | 0.55 (0.14-2.20)    |
| 20-29 years      | 34            | 37.6 | 0.90 (0.65-1.26) | 59                 | 74.9  | 0.79 (0.61-1.02)    |
| 30-39 years      | 25            | 25.5 | 0.98 (0.66-1.45) | 37                 | 66.6  | 0.56 (0.40-0.77)*** |
| 40-49 years      | 14            | 15.9 | 0.88 (0.52-1.49) | 30                 | 54.8  | 0.55 (0.38-0.78)**  |
| ≥50 years        | 5             | 10.8 | 0.46 (0.19-1.11) | 21                 | 40.5  | 0.52 (0.34-0.80)**  |

Obs: observed numbers; Exp: expected numbers; \*p&lt;0.05; \*\*p&lt;0.01; \*\*\*p&lt;0.001.

**Table S18.** SIRs of salmonellosis and campylobacteriosis in the 'financial service activities' sector

| Gender           | Salmonellosis |      |                   | Campylobacteriosis |       |                    |
|------------------|---------------|------|-------------------|--------------------|-------|--------------------|
|                  | Obs           | Exp  | SIR (95%CI)       | Obs                | Exp   | SIR (95%CI)        |
| Male             | 70            | 77.2 | 0.91 (0.72-1.15)  | 115                | 149.1 | 0.77 (0.64-0.93)** |
| Female           | 55            | 68.6 | 0.80 (0.62-1.04)  | 85                 | 107.2 | 0.79 (0.64-0.98)*  |
| Serovar/species  |               |      |                   |                    |       |                    |
| S.Typhimurium    | 20            | 32.4 | 0.62 (0.40-0.96)* | -                  | -     | -                  |
| S. Enteritidis   | 47            | 60.7 | 0.77 (0.58-1.03)  | -                  | -     | -                  |
| Salmonella other | 58            | 52.8 | 1.10 (0.85-1.42)  | -                  | -     | -                  |
| C. jejuni        | -             | -    | -                 | 190                | 238.8 | 0.80 (0.69-0.92)** |
| C. coli          | -             | -    | -                 | 10                 | 17.5  | 0.57 (0.31-1.06)   |
| Age group        |               |      |                   |                    |       |                    |
| 16-19 years      | 3             | 2.7  | 1.11 (0.36-3.45)  | 2                  | 2.9   | 0.70 (0.17-2.78)   |
| 20-29 years      | 36            | 40.5 | 0.89 (0.64-1.23)  | 40                 | 49.0  | 0.82 (0.60-1.11)   |
| 30-39 years      | 35            | 39.1 | 0.89 (0.64-1.25)  | 44                 | 64.2  | 0.69 (0.51-0.92)*  |
| 40-49 years      | 22            | 33.7 | 0.65 (0.43-0.99)* | 51                 | 68.6  | 0.74 (0.56-0.98)*  |
| ≥50 years        | 29            | 29.8 | 0.97 (0.68-1.40)  | 63                 | 71.7  | 0.88 (0.69-1.13)   |

Obs: observed numbers; Exp: expected numbers; \*p&lt;0.05; \*\*p&lt;0.01; \*\*\*p&lt;0.001.

**Table S19.** SIRs of salmonellosis and campylobacteriosis in the 'activities auxiliary to financial services and insurance activities' sector

| Gender           | Salmonellosis |      |                   | Campylobacteriosis |      |                    |
|------------------|---------------|------|-------------------|--------------------|------|--------------------|
|                  | Obs           | Exp  | SIR (95%CI)       | Obs                | Exp  | SIR (95%CI)        |
| Male             | 30            | 29.2 | 1.03 (0.72-1.47)  | 37                 | 54.5 | 0.68 (0.49-0.94)*  |
| Female           | 29            | 29.3 | 0.99 (0.69-1.42)  | 35                 | 45.6 | 0.77 (0.55-1.07)   |
| Serovar/species  |               |      |                   |                    |      |                    |
| S.Typhimurium    | 4             | 13.9 | 0.29 (0.11-0.77)* | -                  | -    | -                  |
| S. Enteritidis   | 30            | 24.2 | 1.24 (0.87-1.78)  | -                  | -    | -                  |
| Salmonella other | 25            | 20.5 | 1.22 (0.83-1.81)  | -                  | -    | -                  |
| C. jejuni        | -             | -    | -                 | 66                 | 93.2 | 0.71 (0.56-0.90)** |
| C. coli          | -             | -    | -                 | 6                  | 6.9  | 0.87 (0.39-1.94)   |
| Age group        |               |      |                   |                    |      |                    |
| 16-19 years      | 1             | 3.4  | 0.29 (0.04-2.09)  | 1                  | 3.4  | 0.30 (0.04-2.09)   |
| 20-29 years      | 27            | 20.5 | 1.32 (0.90-1.92)  | 13                 | 25.8 | 0.50 (0.29-0.87)*  |
| 30-39 years      | 14            | 13.6 | 1.03 (0.61-1.74)  | 19                 | 22.9 | 0.83 (0.53-1.30)   |
| 40-49 years      | 8             | 11.0 | 0.73 (0.36-1.45)  | 21                 | 24.2 | 0.87 (0.57-1.33)   |
| ≥50 years        | 9             | 10.0 | 0.90 (0.47-1.74)  | 18                 | 23.9 | 0.75 (0.48-1.20)   |

Obs: observed numbers; Exp: expected numbers; \*p&lt;0.05; \*\*p&lt;0.01; \*\*\*p&lt;0.001.

**Table S20.** SIRs of salmonellosis and campylobacteriosis in the 'activities of head offices; management consultancy activities' sector

|  | Salmonellosis |  |  | Campylobacteriosis |  |  |
|--|---------------|--|--|--------------------|--|--|
|--|---------------|--|--|--------------------|--|--|

| Gender           | Obs | Exp  | SIR (95%CI)       | Obs | Exp   | SIR (95%CI)         |
|------------------|-----|------|-------------------|-----|-------|---------------------|
| Male             | 73  | 83.2 | 0.88 (0.70-1.10)  | 133 | 176.8 | 0.75 (0.63-0.89)**  |
| Female           | 61  | 58.2 | 1.05 (0.82-1.35)  | 58  | 102.1 | 0.57 (0.44-0.73)*** |
| Serovar/species  |     |      |                   |     |       |                     |
| S.Typhimurium    | 28  | 34.9 | 0.80 (0.55-1.16)  | -   | -     | -                   |
| S. Enteritidis   | 50  | 55.4 | 0.90 (0.68-1.19)  | -   | -     | -                   |
| Salmonella other | 56  | 51.2 | 1.09 (0.84-1.42)  | -   | -     | -                   |
| C. jejuni        | -   | -    | -                 | 171 | 259.9 | 0.66 (0.57-0.76)*** |
| C. coli          | -   | -    | -                 | 20  | 19.1  | 1.05 (0.68-1.62)    |
| Age group        |     |      |                   |     |       |                     |
| 16-19 years      | 13  | 6.9  | 1.88 (1.09-3.24)* | 8   | 8.6   | 0.93 (0.46-1.85)    |
| 20-29 years      | 48  | 48.4 | 0.99 (0.75-1.32)  | 54  | 73.5  | 0.74 (0.56-0.96)*   |
| 30-39 years      | 22  | 31.5 | 0.70 (0.46-1.06)  | 38  | 58.9  | 0.64 (0.47-0.89)**  |
| 40-49 years      | 26  | 26.5 | 0.98 (0.67-1.44)  | 37  | 63.7  | 0.58 (0.42-0.80)**  |
| ≥50 years        | 25  | 28.2 | 0.89 (0.60-1.31)  | 54  | 74.2  | 0.73 (0.56-0.95)*   |

Obs: observed numbers; Exp: expected numbers; \*p<0.05; \*\*p<0.01; \*\*\*p<0.001.

**Table S21.** SIRs of salmonellosis and campylobacteriosis in the 'activities of membership organizations' sector

| Gender           | Salmonellosis |      |                  | Campylobacteriosis |       |                   |
|------------------|---------------|------|------------------|--------------------|-------|-------------------|
|                  | Obs           | Exp  | SIR (95%CI)      | Obs                | Exp   | SIR (95%CI)       |
| Male             | 33            | 40.1 | 0.82 (0.58-1.16) | 56                 | 67.0  | 0.84 (0.64-1.09)  |
| Female           | 41            | 40.9 | 1.00 (0.74-1.36) | 57                 | 73.0  | 0.78 (0.60-1.01)  |
| Serovar/species  |               |      |                  |                    |       |                   |
| S.Typhimurium    | 16            | 20.8 | 0.77 (0.47-1.25) | -                  | -     | -                 |
| S. Enteritidis   | 26            | 32.5 | 0.80 (0.54-1.18) | -                  | -     | -                 |
| Salmonella other | 32            | 27.7 | 1.15 (0.82-1.63) | -                  | -     | -                 |
| C. jejuni        | -             | -    | -                | 107                | 130.1 | 0.82 (0.68-0.99)* |
| C. coli          | -             | -    | -                | 6                  | 9.9   | 0.61 (0.27-1.35)  |
| Age group        |               |      |                  |                    |       |                   |
| 16-19 years      | 13            | 11.9 | 1.09 (0.63-1.88) | 10                 | 11.2  | 0.89 (0.48-1.66)  |
| 20-29 years      | 20            | 22.1 | 0.90 (0.58-1.40) | 26                 | 33.7  | 0.77 (0.53-1.13)  |
| 30-39 years      | 12            | 12.9 | 0.93 (0.53-1.64) | 19                 | 22.1  | 0.86 (0.55-1.35)  |
| 40-49 years      | 8             | 14.2 | 0.56 (0.28-1.12) | 17                 | 28.1  | 0.60 (0.38-0.97)* |
| ≥50 years        | 21            | 20.0 | 1.05 (0.69-1.61) | 41                 | 44.9  | 0.91 (0.67-1.24)  |

Obs: observed numbers; Exp: expected numbers; \*p<0.05; \*\*p<0.01; \*\*\*p<0.001.

**Table S22.** SIRs of salmonellosis and campylobacteriosis in the 'education' sector

| Gender           | Salmonellosis |       |                    | Campylobacteriosis |       |                     |
|------------------|---------------|-------|--------------------|--------------------|-------|---------------------|
|                  | Obs           | Exp   | SIR (95%CI)        | Obs                | Exp   | SIR (95%CI)         |
| Male             | 169           | 190.7 | 0.89 (0.76-1.03)   | 382                | 376.7 | 1.01 (0.92-1.12)    |
| Female           | 259           | 311.6 | 0.83 (0.74-0.94)** | 475                | 557.9 | 0.85 (0.78-0.93)*** |
| Serovar/species  |               |       |                    |                    |       |                     |
| S.Typhimurium    | 93            | 113.9 | 0.82 (0.67-1.00)   | -                  | -     | -                   |
| S. Enteritidis   | 161           | 200.6 | 0.80 (0.69-0.94)** | -                  | -     | -                   |
| Salmonella other | 174           | 187.8 | 0.93 (0.80-1.07)   | -                  | -     | -                   |
| C. jejuni        | -             | -     | -                  | 795                | 870.0 | 0.91 (0.85-0.98)*   |
| C. coli          | -             | -     | -                  | 62                 | 64.6  | 0.96 (0.75-1.23)    |
| Age group        |               |       |                    |                    |       |                     |
| 16-19 years      | 20            | 12.9  | 1.55 (1.00-2.40)   | 22                 | 17.6  | 1.25 (0.83-1.90)    |
| 20-29 years      | 113           | 148.4 | 0.76 (0.63-0.92)** | 244                | 234.8 | 1.04 (0.92-1.18)    |
| 30-39 years      | 80            | 83.0  | 0.96 (0.77-1.20)   | 134                | 153.0 | 0.88 (0.74-1.04)    |
| 40-49 years      | 93            | 104.0 | 0.89 (0.73-1.10)   | 146                | 183.4 | 0.80 (0.68-0.94)**  |
| ≥50 years        | 122           | 154.0 | 0.79 (0.66-0.95)*  | 311                | 345.8 | 0.90 (0.80-1.01)    |

Obs: observed numbers; Exp: expected numbers; \*p<0.05; \*\*p<0.01; \*\*\*p<0.001.

**Table S23.** SIRs of salmonellosis and campylobacteriosis in the 'crop and animal production and hunting' sector

| Gender          | Salmonellosis |      |                  | Campylobacteriosis |       |                    |
|-----------------|---------------|------|------------------|--------------------|-------|--------------------|
|                 | Obs           | Exp  | SIR (95%CI)      | Obs                | Exp   | SIR (95%CI)        |
| Male            | 76            | 77.5 | 0.98 (0.78-1.23) | 108                | 121.1 | 0.89 (0.74-1.08)   |
| Female          | 29            | 41.7 | 0.70 (0.48-1.00) | 33                 | 60.1  | 0.55 (0.39-0.77)** |
| Serovar/species |               |      |                  |                    |       |                    |

|                         |    |      |                    |     |       |                    |
|-------------------------|----|------|--------------------|-----|-------|--------------------|
| <i>S.</i> Typhimurium   | 40 | 35.8 | 1.12 (0.82-1.52)   | -   | -     | -                  |
| <i>S.</i> Enteritidis   | 47 | 47.5 | 0.99 (0.74-1.32)   | -   | -     | -                  |
| <i>Salmonella</i> other | 18 | 35.9 | 0.50 (0.32-0.80)** | -   | -     | -                  |
| <i>C.</i> jejuni        | -  | -    | -                  | 134 | 168.8 | 0.79 (0.67-0.94)** |
| <i>C.</i> coli          | -  | -    | -                  | 7   | 12.4  | 0.56 (0.27-1.18)   |
| <b>Age group</b>        |    |      |                    |     |       |                    |
| 16-19 years             | 33 | 36.9 | 0.90 (0.64-1.26)   | 50  | 44.5  | 1.12 (0.85-1.48)   |
| 20-29 years             | 35 | 38.8 | 0.90 (0.65-1.26)   | 41  | 52.5  | 0.78 (0.58-1.06)   |
| 30-39 years             | 11 | 14.7 | 0.75 (0.41-1.35)   | 13  | 22.2  | 0.59 (0.34-1.01)   |
| 40-49 years             | 16 | 13.9 | 1.15 (0.71-1.88)   | 14  | 27.6  | 0.51 (0.30-0.86)*  |
| ≥50 years               | 10 | 14.9 | 0.67 (0.36-1.25)   | 23  | 34.4  | 0.67 (0.44-1.01)   |

Obs: observed numbers; Exp: expected numbers; \*p<0.05; \*\*p<0.01; \*\*\*p<0.001.

**Table S24.** SIRs of salmonellosis and campylobacteriosis in the 'construction of buildings' sector

| Gender                  | Salmonellosis |      |                  | Campylobacteriosis |       |                   |
|-------------------------|---------------|------|------------------|--------------------|-------|-------------------|
|                         | Obs           | Exp  | SIR (95%CI)      | Obs                | Exp   | SIR (95%CI)       |
| Male                    | 58            | 56.1 | 1.03 (0.80-1.34) | 123                | 151.2 | 0.81 (0.68-0.97)* |
| Female                  | 6             | 8.1  | 0.74 (0.33-1.65) | 18                 | 18.5  | 0.97 (0.61-1.54)  |
| <b>Serovar/species</b>  |               |      |                  |                    |       |                   |
| <i>S.</i> Typhimurium   | 22            | 18.2 | 1.21 (0.80-1.84) | -                  | -     | -                 |
| <i>S.</i> Enteritidis   | 22            | 22.0 | 1.00 (0.66-1.52) | -                  | -     | -                 |
| <i>Salmonella</i> other | 20            | 24.0 | 0.83 (0.54-1.29) | -                  | -     | -                 |
| <i>C.</i> jejuni        | -             | -    | -                | 136                | 158.0 | 0.86 (0.73-1.02)  |
| <i>C.</i> coli          | -             | -    | -                | 5                  | 11.7  | 0.43 (0.18-1.02)  |
| <b>Age group</b>        |               |      |                  |                    |       |                   |
| 16-19 years             | 2             | 3.1  | 0.64 (0.16-2.56) | 4                  | 5.4   | 0.75 (0.28-1.99)  |
| 20-29 years             | 29            | 22.8 | 1.27 (0.88-1.83) | 35                 | 42.5  | 0.82 (0.59-1.15)  |
| 30-39 years             | 12            | 11.8 | 1.01 (0.58-1.79) | 26                 | 30.3  | 0.86 (0.58-1.26)  |
| 40-49 years             | 8             | 10.2 | 0.78 (0.39-1.56) | 28                 | 34.4  | 0.81 (0.56-1.18)  |
| ≥50 years               | 13            | 16.1 | 0.81 (0.47-1.39) | 48                 | 57.1  | 0.84 (0.63-1.11)  |

Obs: observed numbers; Exp: expected numbers; \*p<0.05; \*\*p<0.01; \*\*\*p<0.001.

**Table S25.** SIRs of salmonellosis and campylobacteriosis in the 'wholesale trade' sector

| Gender                  | Salmonellosis |       |                   | Campylobacteriosis |       |                     |
|-------------------------|---------------|-------|-------------------|--------------------|-------|---------------------|
|                         | Obs           | Exp   | SIR (95%CI)       | Obs                | Exp   | SIR (95%CI)         |
| Male                    | 284           | 288.8 | 0.98 (0.88-1.10)  | 517                | 592.7 | 0.87 (0.80-0.95)**  |
| Female                  | 119           | 142.8 | 0.83 (0.70-1.00)* | 199                | 253.0 | 0.79 (0.68-0.90)**  |
| <b>Serovar/species</b>  |               |       |                   |                    |       |                     |
| <i>S.</i> Typhimurium   | 103           | 109.9 | 0.94 (0.77-1.14)  | -                  | -     | -                   |
| <i>S.</i> Enteritidis   | 168           | 168.6 | 1.00 (0.86-1.16)  | -                  | -     | -                   |
| <i>Salmonella</i> other | 132           | 153.1 | 0.86 (0.73-1.02)  | -                  | -     | -                   |
| <i>C.</i> jejuni        | -             | -     | -                 | 665                | 788.1 | 0.84 (0.78-0.91)*** |
| <i>C.</i> coli          | -             | -     | -                 | 51                 | 57.6  | 0.89 (0.67-1.17)    |
| <b>Age group</b>        |               |       |                   |                    |       |                     |
| 16-19 years             | 37            | 32.2  | 1.15 (0.83-1.59)  | 41                 | 41.2  | 1.00 (0.73-1.35)    |
| 20-29 years             | 137           | 147.8 | 0.93 (0.78-1.10)  | 189                | 223.3 | 0.85 (0.73-0.97)*   |
| 30-39 years             | 94            | 96.2  | 0.98 (0.80-1.20)  | 164                | 181.8 | 0.90 (0.77-1.05)    |
| 40-49 years             | 68            | 78.4  | 0.87 (0.68-1.10)  | 174                | 195.2 | 0.89 (0.77-1.03)    |
| ≥50 years               | 67            | 76.9  | 0.87 (0.69-1.11)  | 148                | 204.2 | 0.72 (0.62-0.85)*** |

Obs: observed numbers; Exp: expected numbers; \*p<0.05; \*\*p<0.01; \*\*\*p<0.001.

**Table S26.** SIRs of salmonellosis and campylobacteriosis in the 'land transport' sector

| Gender                  | Salmonellosis |       |                   | Campylobacteriosis |       |                  |
|-------------------------|---------------|-------|-------------------|--------------------|-------|------------------|
|                         | Obs           | Exp   | SIR (95%CI)       | Obs                | Exp   | SIR (95%CI)      |
| Male                    | 137           | 153.2 | 0.89 (0.76-1.06)  | 315                | 293.6 | 1.07 (0.96-1.20) |
| Female                  | 20            | 32.0  | 0.63 (0.40-0.97)* | 50                 | 51.4  | 0.97 (0.74-1.28) |
| <b>Serovar/species</b>  |               |       |                   |                    |       |                  |
| <i>S.</i> Typhimurium   | 40            | 45.1  | 0.89 (0.65-1.21)  | -                  | -     | -                |
| <i>S.</i> Enteritidis   | 65            | 75.3  | 0.86 (0.68-1.10)  | -                  | -     | -                |
| <i>Salmonella</i> other | 52            | 64.7  | 0.80 (0.61-1.05)  | -                  | -     | -                |
| <i>C.</i> jejuni        | -             | -     | -                 | 337                | 321.3 | 1.05 (0.94-1.17) |
| <i>C.</i> coli          | -             | -     | -                 | 28                 | 23.7  | 1.18 (0.81-1.71) |

| Age group   | Obs | Exp  | SIR (95%CI)      | Obs | Exp   | SIR (95%CI)      |
|-------------|-----|------|------------------|-----|-------|------------------|
| 16-19 years | 7   | 9.6  | 0.73 (0.35-1.53) | 12  | 9.3   | 1.28 (0.73-2.26) |
| 20-29 years | 48  | 49.7 | 0.97 (0.73-1.28) | 66  | 65.1  | 1.01 (0.80-1.29) |
| 30-39 years | 25  | 33.5 | 0.75 (0.50-1.10) | 47  | 51.9  | 0.91 (0.68-1.21) |
| 40-49 years | 26  | 38.2 | 0.68 (0.46-1.00) | 77  | 77.0  | 1.00 (0.80-1.25) |
| ≥50 years   | 51  | 54.2 | 0.94 (0.72-1.24) | 163 | 141.7 | 1.15 (0.99-1.34) |

Obs: observed numbers; Exp: expected numbers; \*p<0.05; \*\*p<0.01; \*\*\*p<0.001.

**Table S27.** SIRs of salmonellosis and campylobacteriosis in the 'services to buildings and landscape activities' sector [81]

| Gender | Salmonellosis |       |                  | Campylobacteriosis |       |                   |
|--------|---------------|-------|------------------|--------------------|-------|-------------------|
|        | Obs           | Exp   | SIR (95%CI)      | Obs                | Exp   | SIR (95%CI)       |
| Male   | 77            | 69.3  | 1.11 (0.89-1.39) | 106                | 117.2 | 0.90 (0.75-1.09)  |
| Female | 107           | 106.9 | 1.00 (0.83-1.21) | 141                | 170.4 | 0.83 (0.70-0.98)* |

  

| Serovar/species         | Obs | Exp  | SIR (95%CI)      | Obs | Exp   | SIR (95%CI)        |
|-------------------------|-----|------|------------------|-----|-------|--------------------|
| <i>S. Typhimurium</i>   | 46  | 44.7 | 1.03 (0.77-1.37) | -   | -     | -                  |
| <i>S. Enteritidis</i>   | 81  | 71.9 | 1.13 (0.91-1.40) | -   | -     | -                  |
| <i>Salmonella</i> other | 57  | 59.7 | 0.95 (0.74-1.24) | -   | -     | -                  |
| <i>C. jejuni</i>        | -   | -    | -                | 225 | 267.5 | 0.84 (0.74-0.96)** |
| <i>C. coli</i>          | -   | -    | -                | 22  | 20.0  | 1.10 (0.72-1.67)   |

  

| Age group   | Obs | Exp  | SIR (95%CI)      | Obs | Exp  | SIR (95%CI)       |
|-------------|-----|------|------------------|-----|------|-------------------|
| 16-19 years | 23  | 23.4 | 0.98 (0.65-1.48) | 17  | 23.7 | 0.72 (0.45-1.15)  |
| 20-29 years | 46  | 60.8 | 0.76 (0.57-1.01) | 75  | 84.7 | 0.89 (0.71-1.11)  |
| 30-39 years | 38  | 30.6 | 1.24 (0.90-1.70) | 45  | 49.4 | 0.91 (0.68-1.22)  |
| 40-49 years | 37  | 31.3 | 1.18 (0.86-1.63) | 63  | 62.7 | 1.00 (0.78-1.29)  |
| ≥50 years   | 40  | 30.2 | 1.33 (0.97-1.81) | 47  | 66.9 | 0.70 (0.53-0.93)* |

Obs: observed numbers; Exp: expected numbers; \*p<0.05; \*\*p<0.01; \*\*\*p<0.001.

**Table S28.** Risk group characteristics

|                                            | Live animals     | Food production  | Food sale        |
|--------------------------------------------|------------------|------------------|------------------|
| Number of people exposed                   |                  |                  |                  |
| <b>Salmonellosis data (1999-2016)</b>      |                  |                  |                  |
| Total                                      | 240,993          | 2,037,210        | 224,051          |
| Male                                       | 154,471          | 962,653          | 101,096          |
| Female                                     | 86,522           | 1,074,557        | 142,955          |
| <b>Campylobacteriosis data (2004-2016)</b> |                  |                  |                  |
| Total                                      | 172,978          | 1,666,621        | 178,427          |
| Male                                       | 108,825          | 791,387          | 75,799           |
| Female                                     | 64,153           | 875,234          | 102,628          |
| Median age at entry (IQR)                  | 27 years (20-39) | 20 years (17-28) | 23 years (18-36) |
| Median age at infection (IQR)              |                  |                  |                  |
| Salmonellosis                              | 26 years (20-38) | 22 years (19-29) | 21 years (18-33) |
| Campylobacteriosis                         | 31 years (21-49) | 23 years (20-34) | 25 years (20-39) |
